# Supplementary material for: Inhibition of Phosphoinositide 3-Kinase/Protein Kinase B Signaling Hampers the Vasopressin-dependent Stimulation of Myogenic Differentiation
Source: PubMed Central journal article supplement (PMC6747374; doi:10.3390/ijms20174188), 2019-08-27

## Effect of AKT silencing

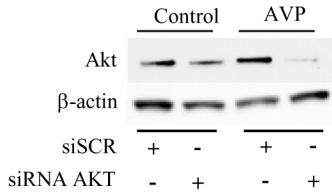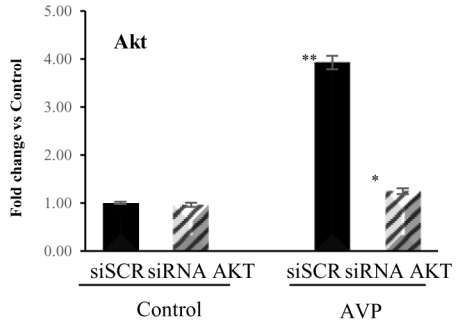

## Transfection efficiency (TYE 563)

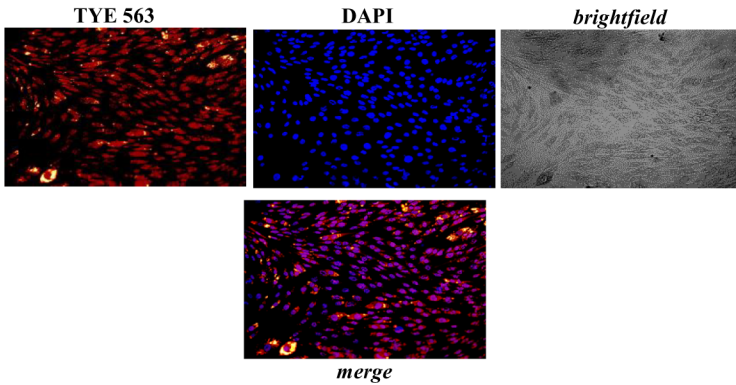

Supplement: ijms-20-04188-s001.pdf [file ijms-20-04188-s001.pdf]
